# Supplementary material for: The Risk of Atrial Fibrillation Increases with Earlier Onset of Obesity: A Mendelian Randomization Study
Source: PubMed Central journal article supplement (PMC9413561; doi:10.7150/ijms.72334), 2022-08-08
Supplement: ijmsv19p1388s1.pdf [file ijmsv19p1388s1.pdf]

## *Supplementary Material*

### Supplementary Figures and Tables

**Table S1 SNPs included in MR studies**

| <b>SNP</b>                           | <b>Chr</b> | <b>Pos</b> | <b>Gene names</b>      |
|--------------------------------------|------------|------------|------------------------|
| <b>SNPs related to adult obesity</b> |            |            |                        |
| rs8028313                            | 15         | 68043057   | <i>MAP2K5</i>          |
| rs887912                             | 2          | 59302877   | <i>FANCL</i>           |
| rs9816226                            | 3          | 185834499  | <i>DGKG</i>            |
| rs987237                             | 6          | 50803050   | <i>TFAP2B</i>          |
| rs10182181                           | 2          | 25150296   | <i>ADCY3</i>           |
| rs11075989                           | 16         | 53819877   | <i>FTO</i>             |
| rs13130484                           | 4          | 45175691   | <i>GNPDA2</i>          |
| rs13393304                           | 2          | 637830     | <i>TMEM18</i>          |
| rs2030323                            | 11         | 27728539   | <i>BDNF</i>            |
| rs2307111                            | 5          | 75003678   | <i>POC5</i>            |
| rs29939                              | 19         | 34310800   | <i>KCTD15</i>          |
| rs523288                             | 18         | 57848369   | <i>U4</i>              |
| rs527248                             | 1          | 177875514  | <i>SEC16B</i>          |
| rs7138803                            | 12         | 50247468   | <i>FAIM</i>            |
| rs7141420                            | 14         | 79899454   | <i>NRXN3</i>           |
| rs7531118                            | 1          | 72837239   | <i>NEGR1</i>           |
| rs4929923                            | 11         | 8639200    | <i>TRIM66</i>          |
| <b>SNPs related to childhood BMI</b> |            |            |                        |
| rs13130484                           | 4          | 44870448   | <i>GNPDA2</i>          |
| rs11676272                           | 2          | 24995042   | <i>ADCY3</i>           |
| rs4854349                            | 2          | 637861     | <i>TMEM18</i>          |
| rs543874                             | 1          | 176156103  | <i>SEC16B</i>          |
| rs7132908                            | 12         | 48549415   | <i>FAIM2</i>           |
| rs12429545                           | 13         | 53000207   | <i>OLFM4</i>           |
| rs987237                             | 6          | 50911009   | <i>TFAP2B</i>          |
| rs12041852                           | 1          | 74776088   | <i>TNNI3K</i>          |
| rs13253111                           | 8          | 28117893   | <i>ELP3</i>            |
| rs8092503                            | 18         | 50630485   | <i>RAB27B</i>          |
| rs3829849                            | 9          | 128430621  | <i>LMX1B</i>           |
| rs13387838                           | 2          | 206989692  | <i>ADAM23</i>          |
| rs7550711                            | 1          | 109884409  | <i>GPR61</i>           |
| <b>SNPs related to birth weight</b>  |            |            |                        |
| rs1482852                            | 3          | 156798294  | <i>LOC339894/CCNLI</i> |
| rs138715366                          | 7          | 44246271   | <i>YKT6/GCK</i>        |
| rs7968682                            | 12         | 66371880   | <i>HMGA2</i>           |
| rs17034876                           | 2          | 46484310   | <i>EPAS1</i>           |
| rs35261542                           | 6          | 20675792   | <i>CDKAL1</i>          |
| rs11708067                           | 3          | 123065778  | <i>ADCY5</i>           |

## Supplementary Material

|                        |    |           |                            |
|------------------------|----|-----------|----------------------------|
| rs2174633              | 4  | 17917781  | <i>LCORL/DCAF16</i>        |
| rs7772579              | 6  | 152042502 | <i>ESR1</i>                |
| rs28457693             | 9  | 98217348  | <i>PTCH1/FANCC</i>         |
| rs1801253              | 10 | 115805056 | <i>ADRB1</i>               |
| rs11698914             | 20 | 31327144  | <i>COMMD7</i>              |
| rs2131354              | 4  | 145599908 | <i>LOC646576/HHIP</i>      |
| rs1112718              | 10 | 94479107  | <i>HHEX/IDE</i>            |
| rs2428362 <sup>†</sup> | 17 | 7180274   | <i>CLDN7/SLC2A4</i>        |
| rs11042596             | 11 | 2118860   | <i>INS-IGF2</i>            |
| rs112139215            | 7  | 73034559  | <i>MLXIPL</i>              |
| rs1012167              | 20 | 39159119  | <i>MAFB</i>                |
| rs1480470              | 12 | 66412130  | <i>HMGA2</i>               |
| rs3184504              | 12 | 111884608 | <i>SH2B3</i>               |
| rs7402983              | 15 | 99193276  | <i>IGF1R</i>               |
| rs9645500              | 10 | 70986723  | <i>HKDC1/HK1</i>           |
| rs13266210             | 8  | 41533514  | <i>ANK1</i>                |
| rs2274224              | 10 | 96039597  | <i>PLCE1</i>               |
| rs55958435             | 15 | 96852638  | <i>NR2F2</i>               |
| rs2551347              | 2  | 23912401  | <i>KLHL29</i>              |
| rs10985827             | 9  | 125701608 | <i>RABGAP1/GPR21</i>       |
| rs6533183              | 4  | 106133184 | <i>TET2</i>                |
| rs854037               | 5  | 57091783  | <i>ACTBL2</i>              |
| rs11893688             | 2  | 9695282   | <i>ADAM17</i>              |
| rs28505901             | 9  | 139241030 | <i>GPSM1</i>               |
| rs4444073              | 11 | 10331664  | <i>ADM</i>                 |
| rs71486610             | 10 | 124134803 | <i>PLEKHA1</i>             |
| rs34776209             | 7  | 23513093  | <i>IGF2BP3</i>             |
| rs2418135              | 9  | 113901309 | <i>LPAR1</i>               |
| rs3933326              | 9  | 123633948 | <i>PHF19</i>               |
| rs9379832              | 6  | 26186200  | <i>HIST1H2BE/HIST1H2BH</i> |
| rs72656010             | 8  | 57122215  | <i>PLAG1</i>               |
| rs75034466             | 6  | 34199815  | <i>HMGA1</i>               |
| rs2934844              | 6  | 166142456 | <i>PDE10A</i>              |
| rs7223535              | 17 | 29211667  | <i>ATAD5</i>               |
| rs9348981              | 6  | 35687249  | <i>FKBP5/MAPK13/TEAD3</i>  |
| rs116807401            | 4  | 135121721 | <i>PABPC4L</i>             |
| rs10935733             | 3  | 148622968 | <i>CPA3/AGTR1</i>          |
| rs4719648              | 7  | 2756832   | <i>AMZ1/GNA12</i>          |
| rs4932373              | 15 | 91429287  | <i>FES/FURIN</i>           |
| rs41311445             | 22 | 42070374  | <i>NHP2L1/SREBF2</i>       |
| rs6930558              | 6  | 141878920 | <i>NMBR</i>                |
| rs2306547              | 12 | 26877885  | <i>ITPR2</i>               |
| rs6040076              | 20 | 10658882  | <i>JAG1</i>                |
| rs7819593              | 8  | 106115172 | <i>ZFPM2</i>               |
| rs10283100             | 8  | 120596023 | <i>ENPP2</i>               |
| rs9549046              | 13 | 40647206  | <i>LINC00332</i>           |

|             |    |           |                              |
|-------------|----|-----------|------------------------------|
| rs6575803   | 14 | 101257755 | <i>MIR2392/DLK1</i>          |
| rs10181515  | 2  | 227019461 | <i>LOC646736/COL4A4/IRS1</i> |
| rs8106042   | 19 | 7161849   | <i>INSR</i>                  |
| rs9851257   | 3  | 123125711 | <i>ADCY5</i>                 |
| rs2647873   | 12 | 103081192 | <i>LINC00485/IGF1</i>        |
| rs11055030  | 12 | 12878349  | <i>APOLD1</i>                |
| rs9318511   | 13 | 78601413  | <i>LINC00446</i>             |
| rs1547669   | 6  | 33775641  | <i>MLN</i>                   |
| rs80278614  | 1  | 119412317 | <i>TBX15</i>                 |
| rs62496903  | 8  | 6446938   | <i>MCPHI</i>                 |
| rs670523    | 1  | 155878732 | <i>RIT1/LMNA</i>             |
| rs667515    | 11 | 69449076  | <i>CCND1</i>                 |
| rs516246    | 19 | 49206172  | <i>FUT2</i>                  |
| rs73354194  | 17 | 79905947  | <i>MYADML2</i>               |
| rs7854962   | 9  | 96900505  | <i>PTPDC1</i>                |
| rs2946179   | 5  | 157886627 | <i>EBF1</i>                  |
| rs732563    | 8  | 23345526  | <i>ENTPD4/NKX3-1</i>         |
| rs255773    | 19 | 54723546  | <i>LILRB3/RPS9</i>           |
| rs6467157   | 7  | 127660763 | <i>SND1</i>                  |
| rs6911621   | 6  | 35529025  | <i>FKBP5/MAPK13/TEAD3</i>    |
| rs7744700   | 6  | 53349401  | <i>GCLC</i>                  |
| rs28365970  | 5  | 67585723  | <i>PIK3R1</i>                |
| rs2282978   | 7  | 92264410  | <i>CDK6</i>                  |
| rs73143584  | 20 | 62445702  | <i>ZBTB46</i>                |
| rs78378222  | 17 | 7571752   | <i>TP53</i>                  |
| rs13257363  | 8  | 142252580 | <i>SLC45A4</i>               |
| rs9909342   | 17 | 25652275  | <i>WSB1</i>                  |
| rs13271368  | 8  | 126506140 | <i>TRIB1</i>                 |
| rs3806315   | 1  | 214724668 | <i>PTPN14</i>                |
| rs10830963* | 11 | 92708710  | <i>MTNR1B</i>                |
| rs9366778   | 6  | 31269173  | <i>HLA-C</i>                 |
| rs12401656  | 1  | 43456767  | <i>FLJ32224/SLC2A1</i>       |
| rs4953353   | 2  | 46567276  | <i>EPAS1</i>                 |
| rs72480273  | 1  | 161644871 | <i>FCGR2B/FCGR2C/HSPA6</i>   |
| rs220193    | 21 | 43581308  | <i>UMODL1</i>                |
| rs75844534  | 15 | 38667117  | <i>SPRED1</i>                |
| rs1323438   | 9  | 119115531 | <i>PAPPA</i>                 |
| rs34217484  | 13 | 48854550  | <i>LINC00441/RB1</i>         |
| rs2229742   | 21 | 16339172  | <i>NRIP1</i>                 |
| rs2779165   | 19 | 4915447   | <i>UHRF1</i>                 |
| rs1981627   | 5  | 133838180 | <i>PHF15</i>                 |
| rs34036147  | 8  | 38366249  | <i>C8orf86/FGFR1</i>         |
| rs11867479  | 17 | 68090207  | <i>KCNJ16</i>                |
| rs41355649  | 19 | 33790556  | <i>CEBPA</i>                 |
| rs10883846  | 10 | 104958244 | <i>NT5C2/CYP17A1</i>         |
| rs10913200  | 1  | 176521655 | <i>PAPPA2</i>                |
| rs339969    | 15 | 60883281  | <i>RORA</i>                  |

## Supplementary Material

|             |    |           |                          |
|-------------|----|-----------|--------------------------|
| rs6026449   | 20 | 57272617  | <i>STX16-NPEPL1/GNAS</i> |
| rs40434     | 16 | 55699525  | <i>SLC6A2</i>            |
| rs11711420  | 3  | 183349010 | <i>KLHL24</i>            |
| rs2168443   | 3  | 46947087  | <i>PTH1R</i>             |
| rs3740360   | 10 | 96025491  | <i>PLCE1</i>             |
| rs11082304  | 18 | 20720973  | <i>CABLES1</i>           |
| rs61885091  | 11 | 69791952  | <i>ANO1/FGF4</i>         |
| rs6033062   | 20 | 11207419  | <i>LOC339593</i>         |
| rs134594    | 22 | 29468456  | <i>KREMEN1</i>           |
| rs72681869  | 14 | 50655357  | <i>SOS2</i>              |
| rs6569647   | 6  | 130337266 | <i>L3MBTL3</i>           |
| rs754868    | 2  | 43185532  | <i>HAAO</i>              |
| rs2280235   | 2  | 191843830 | <i>STAT1</i>             |
| rs1203876   | 20 | 22540915  | <i>LINC00261/FOXA2</i>   |
| rs2889874   | 20 | 33715777  | <i>EDEM2/MYH7B</i>       |
| rs6582623   | 12 | 46613394  | <i>SLC38A1</i>           |
| rs61830764  | 1  | 212289976 | <i>DTL</i>               |
| rs10265057  | 7  | 47275737  | <i>TNS3</i>              |
| rs1415701   | 6  | 130345835 | <i>L3MBTL3</i>           |
| rs234864    | 11 | 2857297   | <i>KCNQ1</i>             |
| rs2306700   | 3  | 142123841 | <i>XRNI</i>              |
| rs59084784  | 7  | 22739562  | <i>IL6</i>               |
| rs708122    | 1  | 228216997 | <i>WNT3A</i>             |
| rs1129156   | 19 | 40719076  | <i>MAP3K10/AKT2</i>      |
| rs7285579   | 22 | 46441980  | <i>LOC100271722</i>      |
| rs186606513 | 2  | 97482001  | <i>CNNM3</i>             |
| rs5030317   | 11 | 32410337  | <i>WT1</i>               |
| rs147957154 | 19 | 43431040  | <i>PSG7</i>              |
| rs351930    | 5  | 52003397  | <i>PELO</i>              |
| rs11983722  | 7  | 46298647  | <i>IGFBP3</i>            |
| rs9267812   | 6  | 32128394  | <i>PPT2</i>              |
| rs753381    | 20 | 39797465  | <i>PLCG1</i>             |
| rs4350272   | 10 | 25056118  | <i>ARHGAP21</i>          |
| rs962554    | 6  | 142734204 | <i>GPR126</i>            |
| rs1818782   | 5  | 39424628  | <i>DAB2</i>              |
| rs2237467   | 7  | 50733316  | <i>GRB10</i>             |
| rs2045457   | 16 | 20046115  | <i>GPR139/GPRC5B</i>     |
| rs6925689   | 6  | 126865884 | <i>CENPW</i>             |

---

Supplementary Figures

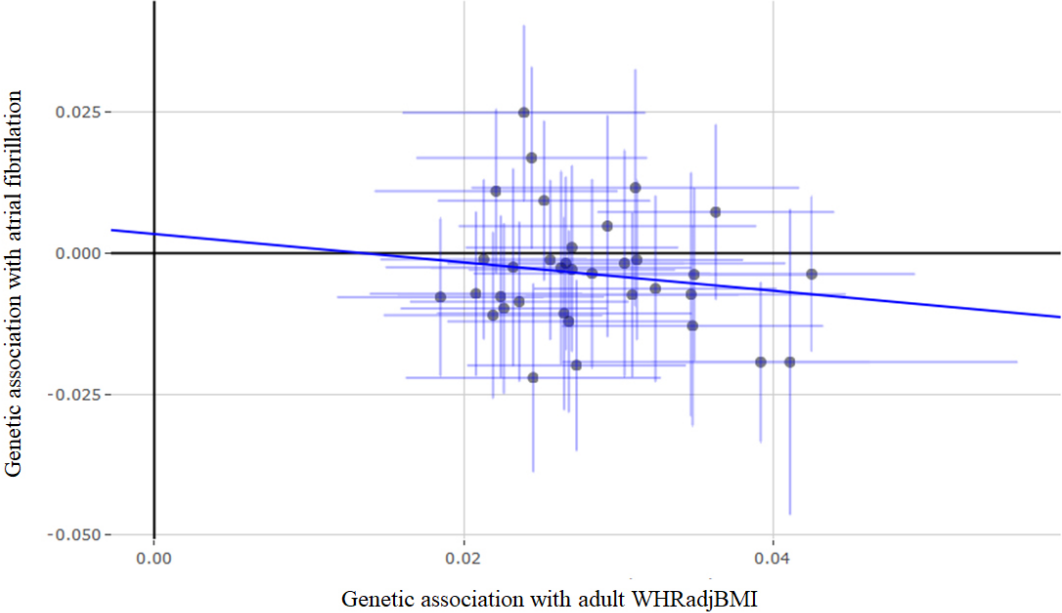

**Figure S1. The effect of adult WHRadjBMI on atrial fibrillation.** Forest plot estimates the effect of genetically increased adult WHRadjBMI risk on atrial fibrillation.

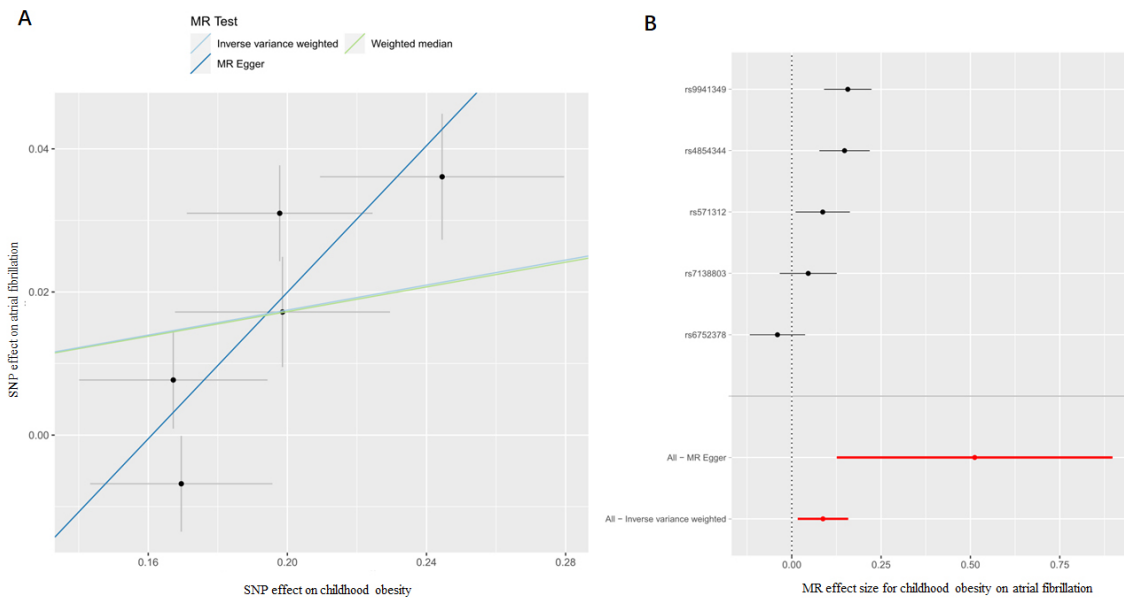

**Figure S2. The effect of childhood obesity on atrial fibrillation.**

MR results for the association of genetically childhood obesity and atrial fibrillation. (A) method comparison; (B) single SNP analysis.
